# Supplementary material for: Identification of Hub Genes Associated with Breast Cancer Using Integrated Gene Expression Data with Protein-Protein Interaction Network
Source: MDPI journal article supplement (doi:10.3390/app13042403), 2023-02-13
Supplement: s1 [file s1]

**Table S1. A list of 540 common DEGs from the microarray and the RNASeq datasets**

| Gene.symbol | logFC       | logCPM     | LR         | PValue     | FDR        |
|-------------|-------------|------------|------------|------------|------------|
| AASS        | -1.55312028 | 3.673132   | 411.956484 | 1.3748E-91 | 2.6952E-90 |
| ABCA6       | -2.68935791 | 3.08585893 | 747.23891  | 1.599E-164 | 1.129E-162 |
| ABCA9       | -3.64817002 | 3.1571675  | 1133.8794  | 1.431E-248 | 2.88E-246  |
| ABCB1       | -1.98713127 | 2.5796718  | 380.968616 | 7.6574E-85 | 1.3359E-83 |
| ABLM1       | -1.38881812 | 7.29873022 | 437.676951 | 3.4676E-97 | 7.5203E-96 |
| ABLM3       | -1.48283803 | 5.37748089 | 170.558818 | 5.5862E-39 | 3.291E-38  |
| ACO1        | -1.80846919 | 6.01480595 | 993.771882 | 4.055E-218 | 5.209E-216 |
| ACSM5       | -4.00354898 | 1.48522467 | 1600.34971 | 0          | 0          |
| ACTA2       | -1.64766649 | 8.8879897  | 351.090022 | 2.4534E-78 | 3.8681E-77 |
| ACTG2       | -1.86357846 | 6.44172977 | 105.603128 | 9.0085E-25 | 3.1881E-24 |
| ACVR1C      | -4.96889303 | 3.14650052 | 1964.01539 | 0          | 0          |
| ADAM33      | -3.31966493 | 3.36095303 | 932.876698 | 6.998E-205 | 7.899E-203 |
| ADAMTS1     | -2.13957296 | 6.24422348 | 446.934212 | 3.352E-99  | 7.5216E-98 |
| ADAMTS9     | -1.1710829  | 4.44461148 | 151.617172 | 7.6824E-35 | 3.9993E-34 |
| ADD3        | -1.29640347 | 6.23044473 | 261.860855 | 6.7437E-59 | 7.0907E-58 |
| ADH1B       | -4.7079933  | 7.51542082 | 639.904931 | 3.504E-141 | 1.776E-139 |
| ADIPOQ      | -4.84524659 | 7.46917636 | 637.948076 | 9.337E-141 | 4.684E-139 |
| ADRB2       | -2.70831265 | 2.06043643 | 903.257047 | 1.922E-198 | 1.948E-196 |
| AHNAK       | -1.82439993 | 11.2869845 | 548.029239 | 3.378E-121 | 1.109E-119 |
| AIFM2       | -1.72185616 | 4.62506938 | 636.015609 | 2.457E-140 | 1.216E-138 |
| AIM1L       | 4.59223815  | 1.10599811 | 358.673869 | 5.4745E-80 | 8.8658E-79 |
| AKAP12      | -2.50040065 | 5.85747493 | 770.270762 | 1.57E-169  | 1.17E-167  |
| AKR1C1      | -3.14709466 | 4.86767924 | 428.066317 | 4.2831E-95 | 9.0005E-94 |
| ALDH18A1    | 1.01689412  | 7.15646616 | 330.406769 | 7.8378E-74 | 1.1482E-72 |
| ALDOC       | -2.00636532 | 4.49973615 | 306.509758 | 1.2577E-68 | 1.6626E-67 |
| ALS2CL      | -1.15070297 | 3.32414231 | 193.789801 | 4.7331E-44 | 3.2829E-43 |
| AMMECR1     | 1.26769841  | 4.50068247 | 219.089464 | 1.4289E-49 | 1.164E-48  |
| AMT         | -1.10447147 | 2.13704153 | 129.24394  | 5.9975E-30 | 2.6067E-29 |
| ANGPT1      | -2.52064429 | 2.87044068 | 512.162102 | 2.147E-113 | 6.024E-112 |
| ANGPTL1     | -3.08093215 | 2.45524726 | 831.614865 | 7.221E-183 | 6.291E-181 |
| ANKDD1A     | -1.38983165 | 1.94958801 | 463.731061 | 7.412E-103 | 1.778E-101 |
| ANKRD35     | -1.43979817 | 2.18156359 | 142.489649 | 7.6001E-33 | 3.6896E-32 |
| ANXA1       | -2.02600397 | 7.72299307 | 520.00786  | 4.215E-115 | 1.241E-113 |
| AOC3        | -3.82934593 | 6.49945117 | 1759.64451 | 0          | 0          |
| APBA1       | -1.22002553 | 3.1379587  | 143.007274 | 5.8565E-33 | 2.8562E-32 |
| APCDD1      | -2.2762449  | 4.80224873 | 668.437983 | 2.184E-147 | 1.223E-145 |
| ARAP3       | -1.40542959 | 4.17227518 | 538.476075 | 4.045E-119 | 1.269E-117 |
| ARHGAP10    | -1.20207601 | 3.97452074 | 233.411728 | 1.0748E-52 | 9.6582E-52 |
| ARHGAP24    | -1.08160237 | 3.5527427  | 245.830602 | 2.1059E-55 | 2.0321E-54 |
| ARHGAP6     | -1.27914605 | 1.99729963 | 188.908196 | 5.5037E-43 | 3.6804E-42 |
| ARHGEF15    | -1.99677168 | 4.29799453 | 808.817459 | 6.531E-178 | 5.467E-176 |
| ARHGEF37    | -1.09003389 | 5.3128019  | 151.180487 | 9.5706E-35 | 4.9701E-34 |
| ARHGEF6     | -1.2543138  | 6.1065112  | 214.626034 | 1.3448E-48 | 1.0607E-47 |

|          |             |            |            |            |            |
|----------|-------------|------------|------------|------------|------------|
| ARID5B   | -1.4640134  | 6.51793213 | 500.75019  | 6.527E-111 | 1.762E-109 |
| ARL4A    | -1.39289964 | 4.74929045 | 263.140874 | 3.5473E-59 | 3.7616E-58 |
| ARL6IP1  | 1.08738956  | 8.72791179 | 292.868486 | 1.1791E-65 | 1.4506E-64 |
| ARMC9    | 1.03591015  | 4.11896624 | 245.727389 | 2.2179E-55 | 2.1374E-54 |
| ARRDC3   | -1.35382766 | 6.78105126 | 453.622619 | 1.174E-100 | 2.708E-99  |
| ASPM     | 4.00855859  | 5.05896444 | 562.701274 | 2.173E-124 | 7.653E-123 |
| ATAD2    | 2.09050954  | 6.42437909 | 336.674416 | 3.3817E-75 | 5.0944E-74 |
| ATP6V0B  | 1.17721038  | 7.03361255 | 385.861801 | 6.5884E-86 | 1.1728E-84 |
| AURKA    | 3.51810299  | 4.81065066 | 556.489288 | 4.879E-123 | 1.675E-121 |
| AURKB    | 4.10088701  | 3.54088463 | 467.465414 | 1.141E-103 | 2.764E-102 |
| BACH2    | -1.27868014 | 2.84770241 | 193.724723 | 4.8904E-44 | 3.3889E-43 |
| BARD1    | 1.39442005  | 2.82060629 | 139.049104 | 4.2969E-32 | 2.0259E-31 |
| BAX      | 1.04912519  | 5.10299559 | 377.363012 | 4.6675E-84 | 8.058E-83  |
| BBOX1    | -1.94712151 | 3.19574869 | 93.9251274 | 3.2769E-22 | 1.0445E-21 |
| BCL2L12  | 1.22449043  | 3.99636294 | 261.079781 | 9.9805E-59 | 1.045E-57  |
| BGN      | 2.13721195  | 9.65011616 | 355.95149  | 2.1436E-79 | 3.4379E-78 |
| BHLHE41  | -1.15289308 | 5.96043493 | 136.153688 | 1.8467E-31 | 8.542E-31  |
| BIRC5    | 4.0389487   | 4.58628403 | 425.968348 | 1.2257E-94 | 2.5399E-93 |
| BLM      | 2.63637894  | 3.33789432 | 399.738974 | 6.2771E-89 | 1.172E-87  |
| BOLA3    | 1.00848509  | 3.84965813 | 152.809349 | 4.2164E-35 | 2.2112E-34 |
| BRIP1    | 2.82687177  | 3.00283437 | 320.602903 | 1.0705E-71 | 1.5004E-70 |
| BUB3     | 1.15710528  | 7.39764789 | 270.781581 | 7.666E-61  | 8.4541E-60 |
| C10orf54 | -1.77597463 | 5.3236097  | 628.298962 | 1.172E-138 | 5.686E-137 |
| C16orf86 | -1.01152126 | 1.20351767 | 191.673544 | 1.371E-43  | 9.34E-43   |
| C16orf89 | -1.01894715 | 3.85117209 | 25.9291665 | 3.5418E-07 | 5.769E-07  |
| C1orf115 | -1.25110748 | 5.85042512 | 158.271092 | 2.7003E-36 | 1.4694E-35 |
| C2orf88  | -2.20239049 | 2.22241617 | 388.556989 | 1.7062E-86 | 3.059E-85  |
| CA4      | -5.65510436 | 1.24298152 | 480.199623 | 1.933E-106 | 4.958E-105 |
| CALCOCO1 | -1.1223055  | 6.34306342 | 440.143904 | 1.0072E-97 | 2.2069E-96 |
| CAPN3    | -2.10673321 | 2.21225583 | 465.622832 | 2.873E-103 | 6.925E-102 |
| CAPS     | 2.45782214  | 5.87646823 | 195.718299 | 1.7957E-44 | 1.2608E-43 |
| CAT      | -1.75460121 | 6.73782041 | 1032.37724 | 1.647E-226 | 2.43E-224  |
| CAV1     | -3.10191524 | 7.33034397 | 1551.81826 | 0          | 0          |
| CAV2     | -2.64930086 | 5.59026716 | 1197.09582 | 2.609E-262 | 5.98E-260  |
| CBX7     | -1.82968857 | 5.54655053 | 677.509476 | 2.326E-149 | 1.343E-147 |
| CCDC3    | -2.75849276 | 4.8171813  | 1027.54019 | 1.854E-225 | 2.682E-223 |
| CCDC69   | -2.73522565 | 5.1767461  | 1074.78877 | 9.965E-236 | 1.706E-233 |
| CCDC82   | -1.07239648 | 3.80726187 | 202.133664 | 7.1488E-46 | 5.1804E-45 |
| CCDC85A  | -1.91331239 | 2.19654797 | 266.651037 | 6.0928E-60 | 6.5972E-59 |
| CCNA2    | 3.26497233  | 4.68235671 | 502.044162 | 3.414E-111 | 9.281E-110 |
| CCNB1    | 2.8553826   | 5.6899732  | 613.074088 | 2.4E-135   | 1.093E-133 |
| CCNB2    | 3.82864037  | 4.60995625 | 577.729938 | 1.169E-127 | 4.399E-126 |
| CCNE2    | 3.60132504  | 3.97252873 | 519.346261 | 5.872E-115 | 1.719E-113 |
| CD209    | -2.5534319  | 2.61645541 | 525.437749 | 2.777E-116 | 8.442E-115 |
| CD300LG  | -5.14303286 | 3.36820974 | 1049.61042 | 2.958E-230 | 4.689E-228 |
| CD36     | -3.75663477 | 7.71465257 | 817.716486 | 7.59E-180  | 6.499E-178 |

|         |             |            |            |            |            |
|---------|-------------|------------|------------|------------|------------|
| CDC14B  | -1.71279667 | 3.81734499 | 726.258431 | 5.832E-160 | 3.828E-158 |
| CDC45   | 3.82330651  | 3.28355562 | 459.192566 | 7.204E-102 | 1.704E-100 |
| CDCA3   | 3.66058339  | 3.65988558 | 507.883324 | 1.831E-112 | 5.071E-111 |
| CDK1    | 3.59297939  | 5.64241362 | 628.690274 | 9.631E-139 | 4.689E-137 |
| CDKN2A  | 2.51297325  | 4.45597384 | 152.109926 | 5.9952E-35 | 3.1308E-34 |
| CDO1    | -3.39364745 | 3.10346627 | 899.858671 | 1.053E-197 | 1.06E-195  |
| CENPE   | 3.25854982  | 4.36643749 | 521.204832 | 2.314E-115 | 6.882E-114 |
| CENPF   | 3.45046838  | 6.84109373 | 581.350102 | 1.907E-128 | 7.381E-127 |
| CENPI   | 3.31160456  | 1.86008561 | 394.648207 | 8.0533E-88 | 1.4795E-86 |
| CENPM   | 3.42548576  | 3.02193807 | 537.13298  | 7.928E-119 | 2.471E-117 |
| CENPN   | 1.70152289  | 4.14819002 | 245.475509 | 2.5168E-55 | 2.4161E-54 |
| CEP55   | 3.95461734  | 4.53156998 | 604.022097 | 2.233E-133 | 9.673E-132 |
| CEP68   | -1.19367033 | 5.38342734 | 799.917731 | 5.623E-176 | 4.603E-174 |
| CFD     | -3.37428857 | 6.21225559 | 760.653778 | 1.936E-167 | 1.4E-165   |
| CHCHD1  | 1.14127566  | 5.19379481 | 194.978773 | 2.604E-44  | 1.8198E-43 |
| CHML    | 1.10796787  | 5.38860708 | 137.327866 | 1.0223E-31 | 4.7673E-31 |
| CKAP2   | 1.57808383  | 5.33882124 | 387.414582 | 3.025E-86  | 5.4041E-85 |
| CLDN11  | -2.33015404 | 3.56510585 | 454.934891 | 6.084E-101 | 1.41E-99   |
| CLDN8   | -1.95604985 | 3.86121777 | 137.856758 | 7.8328E-32 | 3.6664E-31 |
| CLEC7A  | 1.81973087  | 3.73929594 | 150.432968 | 1.3942E-34 | 7.1926E-34 |
| CLIC3   | 2.05568869  | 2.60380805 | 112.014146 | 3.5477E-26 | 1.3338E-25 |
| CLIC5   | -2.04315692 | 3.15841632 | 467.362219 | 1.202E-103 | 2.906E-102 |
| CLIP3   | -1.07127627 | 4.58537392 | 208.833604 | 2.468E-47  | 1.8857E-46 |
| CMTM7   | -1.20611558 | 4.89344106 | 135.451735 | 2.6298E-31 | 1.2071E-30 |
| CNTNAP2 | 4.36789641  | 5.23775579 | 192.184721 | 1.0604E-43 | 7.2672E-43 |
| COBLL1  | -1.13095172 | 5.38423787 | 213.444019 | 2.435E-48  | 1.9115E-47 |
| COL11A1 | 6.94653257  | 7.74293295 | 545.732639 | 1.067E-120 | 3.465E-119 |
| COL12A1 | 1.60930114  | 9.19115441 | 139.940293 | 2.7433E-32 | 1.3008E-31 |
| COL1A1  | 1.87701768  | 12.7717844 | 181.087618 | 2.8051E-41 | 1.7937E-40 |
| COL1A2  | 1.23750446  | 11.9313801 | 105.77916  | 8.2428E-25 | 2.9213E-24 |
| COL3A1  | 1.04854138  | 11.9281793 | 72.9211826 | 1.3493E-17 | 3.5676E-17 |
| COL4A6  | -1.24501071 | 3.04540745 | 47.2759612 | 6.1664E-12 | 1.2699E-11 |
| COL5A1  | 1.77652656  | 9.02410411 | 172.07811  | 2.602E-39  | 1.5569E-38 |
| COL5A2  | 1.84537849  | 9.14752863 | 188.006778 | 8.6581E-43 | 5.7639E-42 |
| CORO2A  | 1.48626999  | 5.82849389 | 204.946065 | 1.74E-46   | 1.2847E-45 |
| COX17   | 1.1192615   | 5.05579423 | 159.028974 | 1.8442E-36 | 1.008E-35  |
| CRIM1   | -1.56589746 | 7.22114485 | 406.238776 | 2.4147E-90 | 4.6361E-89 |
| CRY2    | -1.31305118 | 5.77502741 | 547.734323 | 3.916E-121 | 1.28E-119  |
| CRYAB   | -2.53502415 | 6.88026337 | 282.127127 | 2.5826E-63 | 3.0062E-62 |
| CRYBG3  | -1.68557428 | 3.99705234 | 353.883368 | 6.0464E-79 | 9.6347E-78 |
| CSRP1   | -1.24289048 | 8.53166242 | 361.021012 | 1.6876E-80 | 2.766E-79  |
| CST1    | 7.67503814  | 4.37252167 | 315.346646 | 1.4946E-70 | 2.0524E-69 |
| CTXN1   | 2.65390849  | 4.90444553 | 462.70832  | 1.237E-102 | 2.959E-101 |
| CX3CL1  | -2.64310963 | 6.8788629  | 584.881873 | 3.252E-129 | 1.285E-127 |
| CX3CR1  | -1.02661733 | 3.88540817 | 63.1229726 | 1.942E-15  | 4.6825E-15 |
| CXCL10  | 4.03873246  | 5.86162208 | 273.257015 | 2.2135E-61 | 2.4703E-60 |

|         |             |            |            |            |            |
|---------|-------------|------------|------------|------------|------------|
| CXCL11  | 4.41907992  | 4.00538591 | 307.900787 | 6.2593E-69 | 8.3044E-68 |
| CXCL12  | -1.72301976 | 7.31498959 | 385.805047 | 6.7785E-86 | 1.2037E-84 |
| CXCL2   | -3.38325906 | 2.12365698 | 587.522199 | 8.667E-130 | 3.481E-128 |
| CXorf36 | -1.94954919 | 4.8191429  | 783.329068 | 2.273E-172 | 1.764E-170 |
| CYP2U1  | -1.27038278 | 3.59797245 | 511.216534 | 3.448E-113 | 9.619E-112 |
| DBF4    | 1.62911719  | 3.90658514 | 388.985597 | 1.3763E-86 | 2.4735E-85 |
| DCAF10  | 1.17871599  | 6.90337688 | 130.526591 | 3.1429E-30 | 1.3809E-29 |
| DCAF13  | 1.39489409  | 6.15883389 | 292.691007 | 1.2889E-65 | 1.5831E-64 |
| DDR2    | -2.56477835 | 4.12356877 | 694.949963 | 3.749E-153 | 2.289E-151 |
| DENND2A | -2.32355205 | 2.54868895 | 763.644872 | 4.331E-168 | 3.147E-166 |
| DEPDC1B | 3.89761915  | 2.67647079 | 568.383408 | 1.262E-125 | 4.497E-124 |
| DEPDC1  | 3.86195451  | 3.89753924 | 487.341775 | 5.398E-108 | 1.406E-106 |
| DGAT2   | -3.29341336 | 6.13682134 | 897.017705 | 4.367E-197 | 4.337E-195 |
| DHTKD1  | 1.05604505  | 6.44321502 | 181.022834 | 2.898E-41  | 1.8523E-40 |
| DIAPH3  | 3.08892346  | 3.28434565 | 396.12281  | 3.8456E-88 | 7.1086E-87 |
| DKK3    | -1.45227697 | 6.10231196 | 264.475822 | 1.8152E-59 | 1.9429E-58 |
| DMD     | -2.88361709 | 4.63700438 | 767.589049 | 6.011E-169 | 4.434E-167 |
| DNAH14  | 2.27846769  | 3.18799002 | 517.918669 | 1.201E-114 | 3.466E-113 |
| DNMT3B  | 1.98423808  | 3.05866437 | 218.116363 | 2.3295E-49 | 1.8822E-48 |
| DONSON  | 1.79299873  | 4.01866322 | 351.581688 | 1.9174E-78 | 3.0326E-77 |
| DPY30   | 1.08045919  | 5.33066855 | 272.726471 | 2.8887E-61 | 3.2118E-60 |
| DPYSL2  | -1.33839243 | 6.73888977 | 391.372225 | 4.1605E-87 | 7.5686E-86 |
| DST     | -2.43999248 | 8.12210987 | 909.859664 | 7.054E-200 | 7.299E-198 |
| DTL     | 3.49456011  | 4.91710703 | 656.494319 | 8.644E-145 | 4.683E-143 |
| E2F8    | 3.18333123  | 2.81469995 | 289.821778 | 5.4374E-65 | 6.5917E-64 |
| EBF1    | -2.83938153 | 4.14439074 | 1348.9421  | 2.616E-295 | 8.291E-293 |
| EBF3    | -2.63054096 | 2.50298613 | 968.886334 | 1.041E-212 | 1.271E-210 |
| ECE2    | 2.05769194  | 3.75077409 | 320.740453 | 9.9911E-72 | 1.4043E-70 |
| ECHDC3  | -1.57338076 | 4.4583389  | 405.996641 | 2.7262E-90 | 5.2276E-89 |
| ECM1    | 1.67537671  | 7.0296269  | 73.7000513 | 9.0937E-18 | 2.4224E-17 |
| ECT2    | 2.08487845  | 5.90213701 | 531.864343 | 1.11E-117  | 3.438E-116 |
| EDN3    | -2.3713556  | 1.85580454 | 78.4823769 | 8.0715E-19 | 2.2449E-18 |
| EGFL7   | -1.18330878 | 5.28165114 | 183.866101 | 6.9397E-42 | 4.5131E-41 |
| EGFLAM  | -1.68242975 | 3.80556506 | 553.786259 | 1.889E-122 | 6.355E-121 |
| EGFR    | -1.58576004 | 5.15661109 | 91.7384417 | 9.8924E-22 | 3.0944E-21 |
| EGF     | -1.33992084 | 3.58715587 | 71.5125397 | 2.755E-17  | 7.2101E-17 |
| EGLN3   | 1.67310935  | 5.67499797 | 116.288619 | 4.1092E-27 | 1.6082E-26 |
| EHBP1   | -1.09824698 | 5.47201145 | 529.339743 | 3.932E-117 | 1.208E-115 |
| EHD2    | -2.02813365 | 7.13661894 | 846.47918  | 4.236E-186 | 3.802E-184 |
| ELF5    | -1.229547   | 5.41712712 | 29.1840843 | 6.5818E-08 | 1.1147E-07 |
| EPHB6   | -1.29137875 | 3.66932768 | 84.6115452 | 3.6314E-20 | 1.0686E-19 |
| EPT1    | 1.06780043  | 6.27817223 | 312.131805 | 7.496E-70  | 1.0107E-68 |
| ERG     | -1.51493312 | 4.2467217  | 479.177105 | 3.227E-106 | 8.163E-105 |
| ESPL1   | 3.17158282  | 4.0414582  | 453.591071 | 1.193E-100 | 2.747E-99  |
| ESRP1   | 1.62304531  | 7.39057904 | 305.145286 | 2.4935E-68 | 3.2848E-67 |
| ESYT1   | -1.02072215 | 7.41904453 | 504.033626 | 1.26E-111  | 3.444E-110 |

|         |             |            |            |            |            |
|---------|-------------|------------|------------|------------|------------|
| ETS2    | -1.201533   | 6.01300811 | 291.046178 | 2.9417E-65 | 3.5896E-64 |
| ETV5    | -1.1115673  | 4.72586935 | 163.37666  | 2.0698E-37 | 1.1646E-36 |
| EXO1    | 4.30409384  | 3.7812784  | 581.432159 | 1.83E-128  | 7.102E-127 |
| EZH2    | 2.78018353  | 4.56616619 | 546.490106 | 7.304E-121 | 2.376E-119 |
| EZR     | 1.13763587  | 8.6005658  | 238.137462 | 1.0019E-53 | 9.2088E-53 |
| FADS3   | -1.95108817 | 4.81611826 | 914.014563 | 8.816E-201 | 9.185E-199 |
| FAM149A | -2.22509851 | 1.82712717 | 600.81135  | 1.115E-132 | 4.761E-131 |
| FAM150B | -1.25157553 | 0.29875986 | 16.8370414 | 4.073E-05  | 5.9135E-05 |
| FAM3D   | -1.17912059 | 1.78596732 | 18.5190197 | 1.6822E-05 | 2.5013E-05 |
| FAM64A  | 3.62878727  | 2.69174724 | 418.641325 | 4.8215E-93 | 9.6943E-92 |
| FAM96A  | 1.07903455  | 5.33241554 | 338.527515 | 1.3352E-75 | 2.0217E-74 |
| FANCI   | 2.20285909  | 5.71285498 | 495.390158 | 9.572E-110 | 2.551E-108 |
| FBLN1   | -1.07455697 | 7.94188701 | 125.242251 | 4.5046E-29 | 1.8884E-28 |
| FBXL6   | 1.36017164  | 5.12610327 | 294.164426 | 6.1544E-66 | 7.6158E-65 |
| FCGR1B  | 1.92404543  | 2.66993403 | 262.725949 | 4.3685E-59 | 4.6194E-58 |
| FGF1    | -2.03214035 | 4.21949726 | 586.419116 | 1.506E-129 | 5.999E-128 |
| FGF2    | -2.49289171 | 4.19472276 | 429.407121 | 2.1874E-95 | 4.6031E-94 |
| FGF7    | -1.44374599 | 3.68029504 | 230.088036 | 5.7035E-52 | 5.0282E-51 |
| FGFR1OP | 1.20414423  | 3.97196358 | 263.535985 | 2.9092E-59 | 3.0938E-58 |
| FHL1    | -4.32700284 | 7.04893634 | 1972.49023 | 0          | 0          |
| FKBP4   | 1.42965154  | 8.76707996 | 261.217022 | 9.3162E-59 | 9.7679E-58 |
| FLAD1   | 1.2125123   | 5.93146094 | 334.229251 | 1.1526E-74 | 1.7121E-73 |
| FLNC    | -2.37869616 | 4.74200736 | 496.18291  | 6.434E-110 | 1.721E-108 |
| FLVCR1  | 1.94955653  | 3.68195694 | 469.774364 | 3.588E-104 | 8.778E-103 |
| FN1     | 2.91783574  | 12.1333862 | 442.916223 | 2.5105E-98 | 5.5579E-97 |
| FOXN3   | -1.45290058 | 6.15706148 | 689.724083 | 5.132E-152 | 3.083E-150 |
| FXYD1   | -4.49658312 | 2.74187172 | 1237.05566 | 5.397E-271 | 1.318E-268 |
| FZD4    | -2.36407768 | 6.31353887 | 1012.00306 | 4.418E-222 | 5.825E-220 |
| GEN1    | 1.3557391   | 4.31989206 | 324.417854 | 1.5799E-72 | 2.2677E-71 |
| GFER    | 1.00085302  | 4.8541775  | 259.566408 | 2.1332E-58 | 2.2179E-57 |
| GGCT    | 1.44069294  | 6.85014427 | 254.828632 | 2.3003E-57 | 2.3299E-56 |
| GHR     | -2.85132756 | 4.91203704 | 852.274834 | 2.328E-187 | 2.115E-185 |
| GIMAP8  | -1.76918044 | 4.2473207  | 604.218098 | 2.025E-133 | 8.82E-132  |
| GIN51   | 2.92863273  | 4.2480092  | 576.326238 | 2.362E-127 | 8.796E-126 |
| GJB2    | 4.7140139   | 5.50642363 | 453.417166 | 1.302E-100 | 2.983E-99  |
| GK      | 1.74643761  | 3.2627537  | 362.526729 | 7.9323E-81 | 1.3073E-79 |
| GLTSCR2 | -1.01581881 | 8.35642761 | 276.208446 | 5.0334E-62 | 5.6856E-61 |
| GNAI1   | -2.25232154 | 4.19776673 | 739.916828 | 6.25E-163  | 4.271E-161 |
| GPR68   | 1.83357012  | 3.79050975 | 292.180546 | 1.6651E-65 | 2.0385E-64 |
| GPRASP1 | -1.96507496 | 3.17309767 | 664.356415 | 1.686E-146 | 9.374E-145 |
| GPRC5A  | 2.56583178  | 7.50233716 | 249.68427  | 3.0428E-56 | 2.9983E-55 |
| GPRC5B  | -1.38555893 | 5.26450712 | 223.762845 | 1.3666E-50 | 1.151E-49  |
| GPSM2   | 1.50961614  | 4.95466602 | 239.64099  | 4.7096E-54 | 4.3746E-53 |
| GRAMD3  | -1.41755853 | 4.96304454 | 420.724171 | 1.6975E-93 | 3.4364E-92 |
| GSN     | -2.62559278 | 9.22579033 | 1706.33488 | 0          | 0          |
| GYG2    | -3.95944921 | 5.19021178 | 1841.23525 | 0          | 0          |

|           |             |            |            |            |            |
|-----------|-------------|------------|------------|------------|------------|
| H2AFX     | 1.50464264  | 5.73948268 | 317.779401 | 4.4116E-71 | 6.1143E-70 |
| H2AFZ     | 1.55529062  | 7.70216365 | 397.697774 | 1.7462E-88 | 3.236E-87  |
| HADH      | -1.12123767 | 6.55999567 | 461.465499 | 2.307E-102 | 5.499E-101 |
| HAGHL     | 3.95416217  | 3.52844479 | 596.265201 | 1.087E-131 | 4.536E-130 |
| HBB       | -4.81369228 | 5.08149102 | 1512.67021 | 0          | 0          |
| HIST1H1C  | 2.1469002   | 6.14621044 | 155.491261 | 1.0936E-35 | 5.8544E-35 |
| HIST1H2BD | 2.82639601  | 5.39675968 | 311.139392 | 1.2332E-69 | 1.6597E-68 |
| HIST1H4J  | 2.24422692  | 1.49967823 | 222.595144 | 2.4566E-50 | 2.0516E-49 |
| HIST2H2BE | 2.06529546  | 6.50760227 | 193.150892 | 6.5251E-44 | 4.5071E-43 |
| HMGB3     | 2.60048604  | 6.36150663 | 387.934354 | 2.3312E-86 | 4.1745E-85 |
| HN1L      | 1.29325966  | 8.1836549  | 365.12376  | 2.1574E-81 | 3.5714E-80 |
| HOPX      | 1.26630606  | 3.46494517 | 114.476146 | 1.0249E-26 | 3.9519E-26 |
| HOXA3     | -1.73491079 | 1.6563054  | 258.753454 | 3.208E-58  | 3.3238E-57 |
| HSD17B6   | 3.80260507  | 2.37490309 | 784.844203 | 1.065E-172 | 8.349E-171 |
| HSPA12B   | -1.77902705 | 4.02507011 | 589.438095 | 3.32E-130  | 1.34E-128  |
| HSPB11    | 1.01770926  | 4.55924334 | 163.48868  | 1.9564E-37 | 1.1016E-36 |
| HSPB6     | -4.76903542 | 6.38709801 | 1876.79608 | 0          | 0          |
| IGF1      | -2.06015787 | 5.08735821 | 314.856201 | 1.9114E-70 | 2.6032E-69 |
| IL17RD    | -1.55557189 | 5.47394174 | 274.532276 | 1.1672E-61 | 1.3115E-60 |
| IL34      | -1.4798546  | 3.76128552 | 130.829828 | 2.6977E-30 | 1.1881E-29 |
| INHBA     | 3.77953135  | 4.25784695 | 492.447433 | 4.181E-109 | 1.103E-107 |
| INTS7     | 1.44636548  | 5.45804973 | 507.627638 | 2.081E-112 | 5.754E-111 |
| INTS8     | 1.02408423  | 5.82697027 | 248.696424 | 4.9961E-56 | 4.8908E-55 |
| IRS2      | -1.6757748  | 5.67993639 | 250.755133 | 1.7775E-56 | 1.7585E-55 |
| IRX1      | -2.12182865 | 4.08311652 | 163.249988 | 2.206E-37  | 1.2403E-36 |
| ISM1      | -2.20009333 | 3.9645793  | 518.340836 | 9.717E-115 | 2.833E-113 |
| ITGA7     | -3.69824362 | 4.94875553 | 1550.28318 | 0          | 0          |
| ITGA9     | -1.16675793 | 3.32819286 | 135.526636 | 2.5325E-31 | 1.1635E-30 |
| ITIH5     | -3.70787076 | 5.68763003 | 1367.20724 | 2.808E-299 | 9.298E-297 |
| JAM2      | -1.78363536 | 3.34364056 | 551.183213 | 6.96E-122  | 2.315E-120 |
| JAM3      | -1.0834998  | 5.15196581 | 213.091954 | 2.9061E-48 | 2.2729E-47 |
| JTB       | 1.00889018  | 7.35109252 | 319.510943 | 1.8511E-71 | 2.5799E-70 |
| KANK1     | -1.73883385 | 5.71519316 | 582.953937 | 8.542E-129 | 3.34E-127  |
| KCNB1     | -3.03214026 | 0.60919303 | 353.772332 | 6.3925E-79 | 1.0175E-77 |
| KCNMB1    | -2.47496091 | 3.33248616 | 555.830501 | 6.786E-123 | 2.308E-121 |
| KDELR3    | 1.30266442  | 5.44328981 | 138.892819 | 4.6487E-32 | 2.1891E-31 |
| KIAA1211  | 3.21669121  | 3.46954704 | 360.654718 | 2.0278E-80 | 3.3127E-79 |
| KIF11     | 2.88096744  | 5.28274391 | 609.645033 | 1.336E-134 | 5.962E-133 |
| KIF20A    | 3.86724114  | 4.99878199 | 571.240345 | 3.017E-126 | 1.096E-124 |
| KIF21A    | 1.11666476  | 4.79516588 | 161.31527  | 5.8383E-37 | 3.2445E-36 |
| KIF22     | 1.28338047  | 6.19627576 | 377.991473 | 3.4061E-84 | 5.8939E-83 |
| KIF23     | 3.14517323  | 4.79898155 | 604.818855 | 1.499E-133 | 6.586E-132 |
| KIF26A    | -1.62616591 | 2.98669354 | 331.018196 | 5.768E-74  | 8.4584E-73 |
| KIF26B    | 3.28993125  | 4.2890779  | 425.187079 | 1.8131E-94 | 3.7312E-93 |
| KIF4A     | 4.53223936  | 4.90089788 | 732.140894 | 3.067E-161 | 2.067E-159 |
| KIT       | -2.95683882 | 6.05192652 | 580.963404 | 2.315E-128 | 8.912E-127 |

|          |             |            |            |            |            |
|----------|-------------|------------|------------|------------|------------|
| KLB      | -4.53558393 | 2.67866575 | 2006.86256 | 0          | 0          |
| KLF15    | -3.53728382 | 2.20170343 | 1122.75213 | 3.749E-246 | 7.254E-244 |
| KNTC1    | 1.37305766  | 4.85408939 | 306.985099 | 9.9086E-69 | 1.3111E-67 |
| KRT14    | -2.19660366 | 8.12179942 | 108.577794 | 2.0081E-25 | 7.2902E-25 |
| KRT5     | -2.16307587 | 8.1396802  | 118.881439 | 1.1118E-27 | 4.4409E-27 |
| LAMA3    | -1.91225767 | 6.089385   | 228.217091 | 1.4594E-51 | 1.2664E-50 |
| LAMB3    | -1.82517485 | 6.26410966 | 207.66644  | 4.436E-47  | 3.3533E-46 |
| LAMC2    | -1.38165912 | 6.50077911 | 98.8685835 | 2.6983E-23 | 9.0198E-23 |
| LDB2     | -1.97032574 | 4.13916288 | 865.507807 | 3.092E-190 | 2.879E-188 |
| LEP      | -5.85809546 | 5.14946904 | 929.217971 | 4.368E-204 | 4.821E-202 |
| LGALS12  | -4.52244402 | 2.8908148  | 779.944404 | 1.238E-171 | 9.554E-170 |
| LGR4     | -1.14448798 | 5.29605039 | 128.195858 | 1.017E-29  | 4.3829E-29 |
| LGR6     | -1.57490997 | 3.86999537 | 72.6705104 | 1.5321E-17 | 4.0465E-17 |
| LHX6     | -1.80813558 | 2.81878232 | 409.52524  | 4.6502E-91 | 9.0685E-90 |
| LIFR     | -2.43385253 | 5.78978087 | 822.924499 | 5.597E-181 | 4.82E-179  |
| LIMS2    | -2.43821119 | 5.11273283 | 1280.31023 | 2.148E-280 | 5.519E-278 |
| LIPE     | -4.45375627 | 5.95604737 | 1648.03291 | 0          | 0          |
| LOXL1    | 1.00456319  | 6.28275749 | 93.2608951 | 4.5836E-22 | 1.4527E-21 |
| LPL      | -4.26338383 | 6.99191655 | 1378.83816 | 8.336E-302 | 2.888E-299 |
| LRRN3    | -2.02865012 | 1.69807482 | 243.081539 | 8.3716E-55 | 7.9243E-54 |
| LTBP2    | -1.1287512  | 7.69655692 | 154.512492 | 1.7895E-35 | 9.5186E-35 |
| LY75     | -1.14239164 | 4.97487057 | 120.234491 | 5.6208E-28 | 2.2726E-27 |
| MAF      | -1.07999161 | 5.26478436 | 252.360647 | 7.9398E-57 | 7.9233E-56 |
| MAGI1    | -1.00287568 | 5.38533007 | 210.426113 | 1.1089E-47 | 8.5296E-47 |
| MAGOHB   | 1.30369418  | 4.29004999 | 226.398697 | 3.6371E-51 | 3.1107E-50 |
| MAP1B    | -1.07074614 | 6.19559393 | 130.831479 | 2.6954E-30 | 1.1874E-29 |
| MBOAT2   | 1.69727553  | 5.64471105 | 237.00528  | 1.7689E-53 | 1.6189E-52 |
| MCAM     | -2.1374059  | 7.09596273 | 1021.93731 | 3.062E-224 | 4.185E-222 |
| MEG3     | -1.3712211  | 2.49735434 | 122.623959 | 1.6855E-28 | 6.9543E-28 |
| MEIS2    | -1.5313056  | 3.14802077 | 307.682446 | 6.9838E-69 | 9.2573E-68 |
| MFAP2    | 2.3225662   | 5.80545365 | 305.117904 | 2.528E-68  | 3.3273E-67 |
| MGLL     | -2.11729563 | 6.7489847  | 591.155728 | 1.405E-130 | 5.733E-129 |
| MIAT     | 1.49135336  | 3.35427424 | 122.096414 | 2.1989E-28 | 9.0152E-28 |
| MID1     | -1.29782768 | 4.08799335 | 120.670426 | 4.5119E-28 | 1.8302E-27 |
| MIF      | 1.3036254   | 8.30857094 | 228.222133 | 1.4557E-51 | 1.2639E-50 |
| MLXIPL   | -3.79216789 | 2.57015047 | 917.53026  | 1.517E-201 | 1.592E-199 |
| MMD      | -2.53418166 | 4.81736139 | 1196.67127 | 3.226E-262 | 7.283E-260 |
| MME      | -3.15083136 | 5.79760282 | 806.505292 | 2.078E-177 | 1.72E-175  |
| MMP11    | 6.01084163  | 9.15703088 | 732.742956 | 2.269E-161 | 1.536E-159 |
| MMP1     | 7.35097834  | 5.0867277  | 319.981344 | 1.4621E-71 | 2.0415E-70 |
| MMP3     | 2.68547401  | 3.9625945  | 154.857075 | 1.5046E-35 | 8.0407E-35 |
| MMP9     | 2.43724182  | 7.37967688 | 121.058275 | 3.7107E-28 | 1.5089E-27 |
| MND1     | 3.84773309  | 1.97658609 | 404.927238 | 4.6596E-90 | 8.8891E-89 |
| MPHOSPH9 | 1.00452738  | 3.62318078 | 175.944443 | 3.7236E-40 | 2.2887E-39 |
| MRGPRF   | -2.46168813 | 3.43030668 | 895.02804  | 1.182E-196 | 1.166E-194 |
| MRPL13   | 1.40342356  | 5.68397097 | 262.777    | 4.258E-59  | 4.5057E-58 |

|         |             |            |            |            |            |
|---------|-------------|------------|------------|------------|------------|
| MRPL14  | 1.19954317  | 5.41456532 | 297.147498 | 1.378E-66  | 1.7384E-65 |
| MRPS17  | 1.09912185  | 4.21538112 | 146.916046 | 8.1862E-34 | 4.0997E-33 |
| MSR1    | 1.0299238   | 5.62032957 | 91.6721279 | 1.023E-21  | 3.1959E-21 |
| MTBP    | 1.66960034  | 3.10155529 | 236.970033 | 1.8005E-53 | 1.6467E-52 |
| MYBL1   | 2.67398887  | 4.30104214 | 218.867355 | 1.5975E-49 | 1.2985E-48 |
| MYBL2   | 3.91737683  | 5.90289199 | 372.548118 | 5.2167E-83 | 8.8523E-82 |
| MYH11   | -3.210856   | 7.15354224 | 640.970641 | 2.055E-141 | 1.052E-139 |
| MYL9    | -1.55765988 | 8.23279671 | 412.64016  | 9.7597E-92 | 1.9183E-90 |
| MYLK    | -2.21845209 | 7.42417645 | 598.910042 | 2.89E-132  | 1.22E-130  |
| MYO19   | 1.09499011  | 5.20523456 | 206.840962 | 6.7159E-47 | 5.0332E-46 |
| MYO1G   | 1.35075018  | 3.08487628 | 124.971699 | 5.1626E-29 | 2.1618E-28 |
| NAV2    | -1.3800684  | 5.88214725 | 185.243674 | 3.4722E-42 | 2.2729E-41 |
| NCALD   | -1.56241627 | 5.52083213 | 178.089762 | 1.2662E-40 | 7.9267E-40 |
| NCAPG   | 3.48973019  | 4.64514498 | 568.564407 | 1.152E-125 | 4.117E-124 |
| NDC80   | 3.99545653  | 3.98473264 | 561.089963 | 4.87E-124  | 1.703E-122 |
| NFE2L3  | 1.50454102  | 5.00567982 | 138.507414 | 5.6444E-32 | 2.652E-31  |
| NFIB    | -1.55885505 | 7.06141607 | 210.434959 | 1.104E-47  | 8.4962E-47 |
| NMB     | -2.0892837  | 2.90133985 | 507.90866  | 1.808E-112 | 5.017E-111 |
| NOTCH4  | -1.58588967 | 4.73635787 | 614.093341 | 1.44E-135  | 6.603E-134 |
| NPR2    | -1.62800981 | 3.36809498 | 468.167677 | 8.026E-104 | 1.948E-102 |
| NRG1    | -2.01144736 | 1.72496719 | 164.154861 | 1.3994E-37 | 7.9094E-37 |
| NRG2    | -2.54959174 | 0.54910105 | 254.841154 | 2.2859E-57 | 2.3169E-56 |
| NRIP2   | -1.10841151 | 2.00350265 | 280.527664 | 5.7625E-63 | 6.671E-62  |
| NRN1    | -2.24233914 | 4.13449329 | 611.964578 | 4.183E-135 | 1.888E-133 |
| NUP210  | 1.75648339  | 6.95736143 | 321.603438 | 6.481E-72  | 9.1613E-71 |
| NUSAP1  | 3.3593526   | 5.48030053 | 657.490171 | 5.25E-145  | 2.865E-143 |
| NVL     | 1.52526696  | 5.62303012 | 401.150287 | 3.0941E-89 | 5.8059E-88 |
| OAS2    | 1.78701693  | 7.01937408 | 136.786679 | 1.3426E-31 | 6.2375E-31 |
| OASL    | 2.55741428  | 4.26159277 | 194.576068 | 3.1881E-44 | 2.2227E-43 |
| OAZ3    | 1.84650566  | 2.07317444 | 216.02721  | 6.6525E-49 | 5.3003E-48 |
| OGN     | -2.14925255 | 5.30407324 | 186.414377 | 1.9277E-42 | 1.2686E-41 |
| OLFML2A | -1.26857579 | 5.64995239 | 308.441011 | 4.7736E-69 | 6.3445E-68 |
| OLFML2B | 1.13265332  | 6.11881231 | 107.365429 | 3.7021E-25 | 1.3288E-24 |
| OSR1    | -2.20341195 | 3.38623433 | 205.838684 | 1.1112E-46 | 8.2531E-46 |
| OXTR    | -4.06931566 | 5.27877891 | 1073.78353 | 1.648E-235 | 2.79E-233  |
| PALMD   | -2.61784134 | 5.33251809 | 1080.03766 | 7.205E-237 | 1.248E-234 |
| PAQR4   | 2.3598393   | 6.36576172 | 425.40165  | 1.6283E-94 | 3.3601E-93 |
| PARD3B  | -1.13131472 | 2.14624338 | 136.671586 | 1.4227E-31 | 6.6076E-31 |
| PARP1   | 1.22105346  | 8.24480711 | 393.724935 | 1.2793E-87 | 2.3444E-86 |
| PCK1    | -5.07761811 | 3.24769113 | 717.168159 | 5.526E-158 | 3.504E-156 |
| PCNA    | 1.47883253  | 7.01170519 | 380.198343 | 1.1266E-84 | 1.9564E-83 |
| PDE1A   | -1.00590705 | 1.89471962 | 123.381145 | 1.1508E-28 | 4.7732E-28 |
| PDE1C   | -2.87331316 | 0.98695379 | 446.384727 | 4.415E-99  | 9.8762E-98 |
| PDE2A   | -3.35132713 | 4.07122666 | 1697.40363 | 0          | 0          |
| PDGFD   | -1.72602087 | 4.87848766 | 436.958401 | 4.9707E-97 | 1.0731E-95 |
| PDGFRA  | -1.27899543 | 6.2933913  | 168.566835 | 1.5212E-38 | 8.8361E-38 |



|           |             |            |            |            |            |
|-----------|-------------|------------|------------|------------|------------|
| PDK4      | -3.15431351 | 6.54952252 | 728.370433 | 2.026E-160 | 1.347E-158 |
| PDLIM3    | -1.84933519 | 5.41693055 | 391.210043 | 4.5128E-87 | 8.1996E-86 |
| PDLIM4    | -1.57362022 | 4.80128993 | 293.534633 | 8.4413E-66 | 1.0428E-64 |
| PEAR1     | -2.27766304 | 3.41587003 | 877.574148 | 7.362E-193 | 6.986E-191 |
| PELI2     | -1.57221115 | 3.28912837 | 361.489058 | 1.3346E-80 | 2.1947E-79 |
| PEMT      | -1.43705352 | 4.65326827 | 575.692478 | 3.244E-127 | 1.205E-125 |
| PFDN2     | 1.33122195  | 5.70733004 | 193.145424 | 6.5431E-44 | 4.5174E-43 |
| PFKFB3    | -1.90140095 | 7.25185426 | 463.588122 | 7.963E-103 | 1.907E-101 |
| PHKG2     | 1.18018247  | 5.00644191 | 346.08203  | 3.0224E-77 | 4.7103E-76 |
| PHLDA2    | 1.38747594  | 3.5112747  | 100.376718 | 1.26E-23   | 4.2617E-23 |
| PI16      | -3.85329095 | 4.54456205 | 505.986939 | 4.735E-112 | 1.302E-110 |
| PIGR      | -2.55032783 | 6.49521686 | 146.698907 | 9.1317E-34 | 4.564E-33  |
| PIK3R1    | -1.32790994 | 7.40574395 | 274.703121 | 1.0713E-61 | 1.2046E-60 |
| PITX1     | 3.71235395  | 5.31345669 | 304.111782 | 4.1877E-68 | 5.4923E-67 |
| PLAGL1    | -1.63144886 | 4.0562339  | 315.245413 | 1.5725E-70 | 2.1533E-69 |
| PLAUR     | 1.81093851  | 5.17991308 | 251.176426 | 1.4387E-56 | 1.4262E-55 |
| PLAU      | 1.29274417  | 6.53050107 | 108.518935 | 2.0686E-25 | 7.5026E-25 |
| PLEKHA4   | -1.37338991 | 5.58729465 | 232.262802 | 1.9137E-52 | 1.7073E-51 |
| PLEKHH2   | -1.6572367  | 3.28774824 | 277.657106 | 2.4331E-62 | 2.7715E-61 |
| PLEKHM3   | -1.47167466 | 3.96746801 | 600.804705 | 1.119E-132 | 4.763E-131 |
| PLK4      | 2.30805518  | 3.58524783 | 450.310374 | 6.174E-100 | 1.398E-98  |
| PLSCR4    | -1.95108772 | 4.68149663 | 794.668283 | 7.785E-175 | 6.338E-173 |
| PLXNA4    | -3.19989161 | 4.11965963 | 991.985621 | 9.915E-218 | 1.252E-215 |
| PNPLA2    | -2.06123761 | 7.61196674 | 1155.8723  | 2.375E-253 | 4.983E-251 |
| POLE2     | 2.5958646   | 2.38001327 | 507.079009 | 2.74E-112  | 7.546E-111 |
| POLQ      | 3.42629962  | 2.9729718  | 507.216543 | 2.558E-112 | 7.056E-111 |
| PPARG     | -3.1839813  | 4.23261975 | 1253.88796 | 1.186E-274 | 2.946E-272 |
| PPP1R12B  | -2.03743312 | 6.00314982 | 1230.91141 | 1.168E-269 | 2.807E-267 |
| PPP2R1B   | -1.25692699 | 5.41139963 | 480.103552 | 2.029E-106 | 5.193E-105 |
| PPP4C     | 1.17510323  | 6.74233125 | 424.574884 | 2.4642E-94 | 5.0571E-93 |
| PRNP      | -1.35372543 | 6.9105688  | 289.988995 | 4.9998E-65 | 6.076E-64  |
| PROS1     | -1.82082797 | 4.91473738 | 511.730074 | 2.666E-113 | 7.465E-112 |
| PRX       | -1.57605096 | 3.62927355 | 459.19186  | 7.207E-102 | 1.704E-100 |
| PSMA5     | 1.07009897  | 6.67109941 | 238.290506 | 9.2781E-54 | 8.5435E-53 |
| PSMB3     | 1.05969861  | 6.8347028  | 133.650313 | 6.5158E-31 | 2.9373E-30 |
| PTCHD1    | -1.54387571 | 1.56504697 | 53.4161322 | 2.6987E-13 | 5.9199E-13 |
| PTPRZ1    | -1.34639415 | 2.76729109 | 28.7314217 | 8.3144E-08 | 1.3989E-07 |
| PYCRL     | 1.44947899  | 5.3910799  | 309.066637 | 3.4878E-69 | 4.6605E-68 |
| RAB11FIP4 | 1.13218903  | 5.70721302 | 140.24957  | 2.3477E-32 | 1.1164E-31 |
| RABIF     | 1.50117542  | 4.6961602  | 572.92169  | 1.299E-126 | 4.757E-125 |
| RAD54B    | 2.38501817  | 3.38736264 | 408.5021   | 7.7657E-91 | 1.5026E-89 |
| RAD54L    | 3.67485197  | 3.09914244 | 497.243344 | 3.782E-110 | 1.015E-108 |
| RAP2C     | 1.11682181  | 6.02359695 | 149.995033 | 1.738E-34  | 8.9198E-34 |
| RASIP1    | -1.83901449 | 4.27781304 | 600.203511 | 1.512E-132 | 6.418E-131 |
| RASL12    | -1.16946228 | 3.34080818 | 186.495464 | 1.8507E-42 | 1.219E-41  |
| RBP7      | -2.09492994 | 3.99054194 | 420.864558 | 1.5822E-93 | 3.2073E-92 |

|          |             |            |            |            |            |
|----------|-------------|------------|------------|------------|------------|
| RGS4     | 2.17845722  | 3.71112397 | 197.773728 | 6.3925E-45 | 4.5267E-44 |
| RILP     | -1.5743042  | 2.87751478 | 586.760037 | 1.27E-129  | 5.085E-128 |
| RNASEH2A | 1.80848996  | 4.87135091 | 519.749039 | 4.799E-115 | 1.41E-113  |
| RNF150   | -2.60454281 | 2.36988909 | 520.035869 | 4.157E-115 | 1.226E-113 |
| RNF180   | -1.18516841 | 2.6660453  | 217.86985  | 2.6365E-49 | 2.1256E-48 |
| RNFT2    | 2.69858496  | 2.50332943 | 359.598117 | 3.4442E-80 | 5.6021E-79 |
| ROBO3    | -2.19734901 | 2.50485064 | 764.908805 | 2.3E-168   | 1.688E-166 |
| ROBO4    | -2.04512139 | 4.87725132 | 1026.30637 | 3.438E-225 | 4.878E-223 |
| RSAD2    | 1.88186748  | 5.32392498 | 135.294696 | 2.8463E-31 | 1.304E-30  |
| RSPO3    | -2.23403062 | 2.42326239 | 430.998766 | 9.8516E-96 | 2.0761E-94 |
| RUNX1T1  | -1.7211796  | 1.25619169 | 299.773599 | 3.6906E-67 | 4.7158E-66 |
| S100A11  | 1.1129451   | 8.92883329 | 141.789235 | 1.0814E-32 | 5.2173E-32 |
| SAMD12   | 1.0801088   | 4.98304575 | 113.860473 | 1.3981E-26 | 5.3616E-26 |
| SAMD4A   | -1.60234344 | 4.34974928 | 455.375202 | 4.879E-101 | 1.134E-99  |
| SAMD9    | 1.12334884  | 5.60174158 | 87.8671722 | 7.0001E-21 | 2.1168E-20 |
| SASH1    | -1.26895941 | 6.38905127 | 236.757248 | 2.0035E-53 | 1.8302E-52 |
| SCCPDH   | 1.06325541  | 6.95406751 | 105.063378 | 1.1829E-24 | 4.1665E-24 |
| SCGB1D2  | 1.15934463  | 7.93972983 | 10.7714569 | 0.00103077 | 0.00137218 |
| SCRN2    | -1.26056585 | 4.93344969 | 342.08203  | 2.2462E-76 | 3.4716E-75 |
| SDC1     | 1.62137466  | 8.67440518 | 167.868339 | 2.1615E-38 | 1.2502E-37 |
| SDS      | 2.54146585  | 3.39478313 | 331.15496  | 5.3856E-74 | 7.9133E-73 |
| SEMA3G   | -2.9405937  | 5.45841453 | 1093.08405 | 1.052E-239 | 1.911E-237 |
| SEMA5A   | -1.4966807  | 5.66214166 | 239.844184 | 4.2529E-54 | 3.9528E-53 |
| SEMA6A   | -1.2643794  | 4.73938744 | 129.836925 | 4.4486E-30 | 1.942E-29  |
| SEMA6D   | -1.44208298 | 3.69200034 | 113.33254  | 1.8246E-26 | 6.9561E-26 |
| SERPING1 | -1.24523791 | 8.3370574  | 247.542201 | 8.9181E-56 | 8.69E-55   |
| SFRP1    | -2.688846   | 8.21514069 | 246.494781 | 1.5088E-55 | 1.4616E-54 |
| SGK2     | -3.65054491 | 0.85545833 | 948.582739 | 2.697E-208 | 3.164E-206 |
| SH3BGRL2 | -1.80796139 | 4.66531935 | 538.301747 | 4.415E-119 | 1.382E-117 |
| SH3D19   | -1.81829032 | 6.2388613  | 1032.19226 | 1.807E-226 | 2.639E-224 |
| SHCBP1   | 3.22947961  | 3.6250538  | 495.3825   | 9.608E-110 | 2.556E-108 |
| SIGLEC7  | 1.2443157   | 1.058943   | 126.163523 | 2.8316E-29 | 1.1965E-28 |
| SIRPA    | -1.31980312 | 6.08891848 | 288.280378 | 1.1783E-64 | 1.4157E-63 |
| SKA2     | 1.19107828  | 5.44271649 | 178.547227 | 1.0061E-40 | 6.3193E-40 |
| SKA3     | 3.82072252  | 3.37384637 | 576.593929 | 2.065E-127 | 7.712E-126 |
| SLC11A1  | 1.59412957  | 2.59729877 | 142.763048 | 6.6228E-33 | 3.2225E-32 |
| SLC12A8  | 1.81701812  | 4.4992985  | 402.062828 | 1.9583E-89 | 3.6933E-88 |
| SLC1A4   | 1.01967107  | 6.88327828 | 97.2034532 | 6.2557E-23 | 2.0561E-22 |
| SLC25A27 | -1.69456717 | 2.00502429 | 208.352133 | 3.1433E-47 | 2.3906E-46 |
| SLC35A2  | 1.31858587  | 5.73330264 | 516.942049 | 1.958E-114 | 5.632E-113 |
| SLC39A11 | 1.49732447  | 6.46466212 | 223.335109 | 1.6941E-50 | 1.422E-49  |
| SLC7A5   | 2.37399222  | 7.06437912 | 174.011683 | 9.8409E-40 | 5.9674E-39 |
| SMAD9    | -1.34701791 | 0.37971887 | 167.23192  | 2.9769E-38 | 1.7132E-37 |
| SMS      | 1.17644752  | 6.88443809 | 270.057356 | 1.1026E-60 | 1.2141E-59 |
| SNCA     | -1.50013987 | 1.46643678 | 337.503465 | 2.2314E-75 | 3.3684E-74 |
| SNRPD1   | 1.08781789  | 5.59518278 | 208.426833 | 3.0276E-47 | 2.3049E-46 |

|          |             |            |            |            |            |
|----------|-------------|------------|------------|------------|------------|
| SNRPE    | 1.32993887  | 6.0415942  | 289.502648 | 6.3815E-65 | 7.7049E-64 |
| SNRPF    | 1.11972433  | 5.69015453 | 141.044931 | 1.573E-32  | 7.5404E-32 |
| SOD3     | -2.81105426 | 5.19959289 | 698.918014 | 5.14E-154  | 3.152E-152 |
| SORBS1   | -3.35891444 | 6.83076146 | 1630.60335 | 0          | 0          |
| SORBS2   | -1.04821093 | 5.96893956 | 78.9705844 | 6.3042E-19 | 1.7615E-18 |
| SOSTDC1  | -1.54121267 | 3.20669866 | 52.7943618 | 3.7036E-13 | 8.0708E-13 |
| SOX10    | -2.10492296 | 5.85178008 | 82.294952  | 1.1722E-19 | 3.3774E-19 |
| SOX17    | -2.22912067 | 2.16103065 | 789.067789 | 1.285E-173 | 1.024E-171 |
| SOX7     | -1.74257533 | 3.15837528 | 474.112827 | 4.081E-105 | 1.015E-103 |
| SPAG4    | 1.69252949  | 2.35196454 | 154.613006 | 1.7012E-35 | 9.0621E-35 |
| SPAG5    | 3.17907103  | 5.31540353 | 508.918788 | 1.09E-112  | 3.03E-111  |
| SPP1     | 2.28945475  | 7.99504802 | 150.44646  | 1.3848E-34 | 7.1464E-34 |
| SPTBN1   | -1.8154613  | 8.70194226 | 1091.50348 | 2.32E-239  | 4.165E-237 |
| STAT1    | 1.29954763  | 8.67285498 | 133.256088 | 7.947E-31  | 3.5739E-30 |
| STAT5A   | -1.61181503 | 6.17056141 | 544.252926 | 2.24E-120  | 7.208E-119 |
| STMN1    | 1.81867824  | 7.74933572 | 244.163571 | 4.8629E-55 | 4.6325E-54 |
| STOX2    | -1.25970915 | 0.61231463 | 95.7563745 | 1.2993E-22 | 4.2211E-22 |
| STX1A    | 1.77300841  | 2.9588231  | 249.557526 | 3.2427E-56 | 3.1932E-55 |
| SUN2     | -1.03474342 | 7.53110278 | 299.232899 | 4.8406E-67 | 6.1746E-66 |
| SVEP1    | -3.09928408 | 5.47445388 | 1062.33275 | 5.079E-233 | 8.225E-231 |
| SYNE1    | -1.37445027 | 5.83220759 | 348.38207  | 9.5383E-78 | 1.4928E-76 |
| SYNM     | -3.08503457 | 7.12188691 | 581.067674 | 2.197E-128 | 8.48E-127  |
| TACC1    | -1.61498023 | 6.81289107 | 342.173367 | 2.1456E-76 | 3.3196E-75 |
| TACC3    | 2.34447976  | 5.5418163  | 512.596007 | 1.727E-113 | 4.874E-112 |
| TAGLN    | -1.44576263 | 8.83999757 | 252.082758 | 9.1282E-57 | 9.091E-56  |
| TCEAL7   | -1.86194567 | 1.08556719 | 490.915025 | 9.01E-109  | 2.363E-107 |
| TCEB1    | 1.22972861  | 5.55674993 | 222.652397 | 2.387E-50  | 1.9968E-49 |
| TCF7L2   | -1.06680068 | 5.21834908 | 239.122249 | 6.1108E-54 | 5.6549E-53 |
| TDO2     | 4.84131891  | 2.38232142 | 315.693049 | 1.2562E-70 | 1.7266E-69 |
| TEF      | -1.52006953 | 5.02664747 | 573.764274 | 8.521E-127 | 3.135E-125 |
| TFEC     | 1.12878585  | 3.18680038 | 94.8025984 | 2.1035E-22 | 6.7587E-22 |
| TFPI     | -1.61197208 | 4.80343905 | 232.989212 | 1.3288E-52 | 1.1898E-51 |
| TFRC     | 1.16659624  | 7.39245    | 122.354137 | 1.931E-28  | 7.9454E-28 |
| TGFB1I1  | -1.2828958  | 5.42927845 | 323.626931 | 2.349E-72  | 3.3555E-71 |
| TGFBR3   | -2.33618828 | 6.25494052 | 415.859298 | 1.9441E-92 | 3.8673E-91 |
| THRSP    | -2.59916653 | 4.51552657 | 228.388641 | 1.3389E-51 | 1.1652E-50 |
| TIMELESS | 1.65671406  | 5.69421722 | 425.646308 | 1.4404E-94 | 2.9806E-93 |
| TIMM17A  | 1.3186305   | 6.31969665 | 435.304026 | 1.1389E-96 | 2.431E-95  |
| TINAGL1  | -1.88421885 | 5.59121025 | 390.694167 | 5.8446E-87 | 1.0581E-85 |
| TIPIN    | 1.06083361  | 2.69244519 | 179.433914 | 6.442E-41  | 4.0652E-40 |
| TLE2     | -1.14354358 | 5.58236109 | 211.813722 | 5.5229E-48 | 4.2791E-47 |
| TLE4     | -1.248539   | 4.02209375 | 252.507743 | 7.3746E-57 | 7.3642E-56 |
| TM4SF18  | -1.39862024 | 3.37829566 | 190.605082 | 2.3456E-43 | 1.5799E-42 |
| TMEM100  | -3.0749606  | 2.1595534  | 528.091097 | 7.349E-117 | 2.248E-115 |
| TMEM206  | 1.70824384  | 3.94114943 | 440.955646 | 6.706E-98  | 1.4736E-96 |
| TMEM213  | -1.15031897 | 1.40121905 | 18.139445  | 2.053E-05  | 3.0382E-05 |

|          |             |            |            |            |            |
|----------|-------------|------------|------------|------------|------------|
| TNFSF13B | 1.45866178  | 2.45409307 | 121.057239 | 3.7126E-28 | 1.5093E-27 |
| TNMD     | -3.38766136 | 1.11771244 | 262.301554 | 5.4056E-59 | 5.6957E-58 |
| TNS1     | -3.05028275 | 8.0018483  | 1852.89858 | 0          | 0          |
| TOP2A    | 3.72367896  | 7.42472888 | 459.155544 | 7.339E-102 | 1.733E-100 |
| TP63     | -2.53196645 | 4.56744583 | 312.466283 | 6.3382E-70 | 8.5615E-69 |
| TPM2     | -1.29185555 | 7.0876782  | 201.173396 | 1.1582E-45 | 8.3562E-45 |
| TPM3     | 1.31254129  | 9.17126067 | 572.73903  | 1.424E-126 | 5.2E-125   |
| TRIM11   | 1.23960821  | 5.41382401 | 498.557398 | 1.958E-110 | 5.276E-109 |
| TRIM29   | -1.96991235 | 6.13602531 | 146.79321  | 8.7084E-34 | 4.3539E-33 |
| TRIM59   | 2.3940446   | 4.03427163 | 660.160205 | 1.379E-145 | 7.608E-144 |
| TRNP1    | -1.13424185 | 3.15992438 | 130.673648 | 2.9185E-30 | 1.2831E-29 |
| TSEN54   | 1.13032567  | 4.99947551 | 315.303519 | 1.5273E-70 | 2.0934E-69 |
| TSHZ2    | -2.47309712 | 2.93770597 | 663.844847 | 2.179E-146 | 1.207E-144 |
| TSPAN7   | -2.35827959 | 4.42299984 | 577.769277 | 1.146E-127 | 4.324E-126 |
| TSTA3    | 1.59989901  | 6.84448218 | 395.546627 | 5.1332E-88 | 9.4654E-87 |
| TTC28    | -1.42055248 | 4.81660982 | 553.175337 | 2.566E-122 | 8.61E-121  |
| TUBA1C   | 1.61706949  | 7.73214682 | 433.024715 | 3.5691E-96 | 7.5535E-95 |
| TUSC5    | -5.06178974 | 5.27637772 | 749.203048 | 5.98E-165  | 4.243E-163 |
| TWIST2   | -2.1950325  | 0.81587668 | 530.496654 | 2.202E-117 | 6.794E-116 |
| TXNIP    | -1.80408465 | 9.56679389 | 500.783969 | 6.418E-111 | 1.735E-109 |
| TXN      | 1.05626716  | 7.33610537 | 180.109887 | 4.5859E-41 | 2.9112E-40 |
| TYMP     | 1.48705977  | 6.92265423 | 194.299446 | 3.6636E-44 | 2.5495E-43 |
| TYMS     | 2.43179229  | 5.19466204 | 345.07945  | 4.9967E-77 | 7.7709E-76 |
| UBE2S    | 2.33137022  | 4.90578954 | 422.338296 | 7.5595E-94 | 1.545E-92  |
| UTRN     | -1.39618634 | 7.02919587 | 454.066962 | 9.398E-101 | 2.174E-99  |
| VANGL1   | 1.13617952  | 5.77753628 | 281.920029 | 2.8655E-63 | 3.3301E-62 |
| VCAN     | 1.65911114  | 8.81404171 | 156.56631  | 6.3667E-36 | 3.4294E-35 |
| VPS72    | 1.00804224  | 6.06866219 | 227.230655 | 2.395E-51  | 2.0638E-50 |
| VWF      | -2.06188762 | 7.84737074 | 681.222903 | 3.622E-150 | 2.142E-148 |
| WIF1     | -1.92110932 | 3.4368224  | 42.7074004 | 6.3571E-11 | 1.2461E-10 |
| WLS      | -1.26966324 | 5.94727155 | 153.119944 | 3.6063E-35 | 1.8952E-34 |
| WNK2     | -1.14488555 | 5.3233405  | 101.143149 | 8.557E-24  | 2.9068E-23 |
| YAP1     | -1.02991095 | 7.05510885 | 302.737489 | 8.344E-68  | 1.0867E-66 |
| YWHAZ    | 1.04701156  | 10.2764899 | 175.916564 | 3.7762E-40 | 2.3201E-39 |
| ZCCHC24  | -1.5013859  | 5.63220762 | 367.94613  | 5.2407E-82 | 8.7633E-81 |
| ZNF462   | -1.13748569 | 4.11651983 | 100.13827  | 1.4212E-23 | 4.7939E-23 |
| ZWINT    | 2.84317787  | 5.46058141 | 593.794206 | 3.746E-131 | 1.546E-129 |

---
